# Supplementary material for: CRISPR/Cas9: a molecular Swiss army knife for simultaneous introduction of multiple genetic modifications in Saccharomyces cerevisiae
Source: PubMed Central journal article supplement (PMC4399441; doi:10.1093/femsyr/fov004), 2015-03-17
Supplement: Supplemental_information.pdf [file Supplemental_information.pdf]

# Supplemental information

---

## Table of Contents

|                                                                                                           |           |
|-----------------------------------------------------------------------------------------------------------|-----------|
| <b>Tutorial Yeastricition.....</b>                                                                        | <b>2</b>  |
| <b>Protocol for gene editing using in vivo assembled plasmids containing single gRNAs.....</b>            | <b>6</b>  |
| <b>Protocol for multiplexed gene editing using in vitro assembled plasmids containing two gRNAs .....</b> | <b>10</b> |
| <b>Supplementary Table S1 .....</b>                                                                       | <b>17</b> |
| <b>Supplementary Data S1 .....</b>                                                                        | <b>21</b> |

# Supplemental information 1

## Tutorial Yeastriction

---

If desired, first sign up to the webservice by going to <http://yeastriction.tnw.tudelft.nl> and clicking Register in the top right corner (the advantage of registering is that the webtool can save your defaults like your strain of choice, restriction enzymes, etc.). After that, login using the Login link, also in the top right corner. The following screen will be shown.



Yeastriction v0.1    Todo    Protocol    Cite    Register    Login

### Sign in

Email

Password

or [Sign up](#)

After logging in, click Yeastriction to start using the tool. In the screen (see below) select your yeast strain in the dropdown.

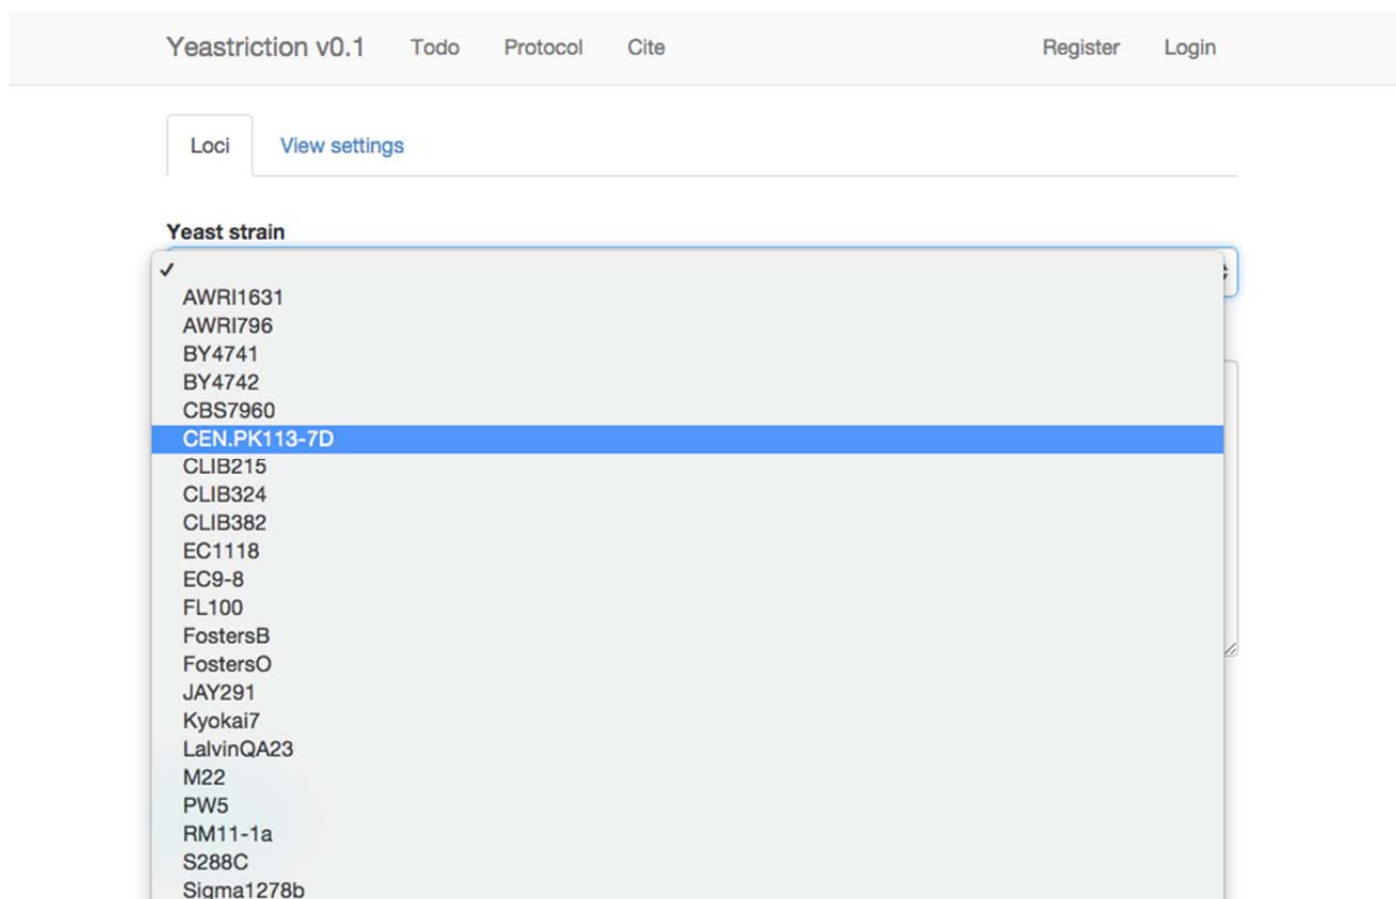

Yeastriction v0.1    Todo    Protocol    Cite    Register    Login

[Loci](#)    [View settings](#)

#### Yeast strain

- ✓ AWRI1631
- AWRI796
- BY4741
- BY4742
- CBS7960
- GEN.PK113-7D**
- CLIB215
- CLIB324
- CLIB382
- EC1118
- EC9-8
- FL100
- FostersB
- FostersO
- JAY291
- Kyokai7
- LalvinQA23
- M22
- PW5
- RM11-1a
- S288C
- Sigma1278b

Next, write one or multiple gene names (e.g. *ACS1 ACS2*) and/or systematic names (like YAL054C YLR153C). (The delimiter between the names doesn't matter; it can be spaces, commas, newlines, etc.)

Loci

[View settings](#)**Yeast strain**

CEN.PK113-7D

**Loci**

ACS1 YLR153C

**Action**

Knockouts

[Find targets](#)

Click on Find targets.

Now the tool will give you the following screen.

Loci View settings **Targets**

Fetches: YLR153C, ACS1

| Primer name             | Primer sequence (5' → 3')                                                                                                   |
|-------------------------|-----------------------------------------------------------------------------------------------------------------------------|
| YLR153C_targetRNA FW ▾  | TGCGCATGTTTCGGCGTTCGAACTTCTCCGCAGTGAAAGATAAATGATCTTAAGATTAA<br>TCAAACGTGTGTTTTAGAGCTAGAAATAGCAAGTTAAAATAAGGCTAGTCCGTTATCAAC |
| YLR153C_targetRNA RV    | GTTGATAACGGACTAGCCTTATTTTAACTTGCTATTTCTAGCTCTAAAACACACGTTTGA<br>TTAATCTTAAGATCATTATCTTTCACTGCGGAGAAGTTTCGAACGCCGAAACATGCGCA |
| YLR153C_repair oligo fw | GGTTAGTGATTGTTATACACAACAGAAATACAGGAAAGTAAATCAATACAATAATAAAAT<br>CTTAAATGAGAAAATTTGCGTAATGAGATAAAATTTGCTCCTTTTCTGTTTCTATTTT  |
| YLR153C_repair oligo rv | AAAATAGAAAACAGAAAAGGAGCGAAATTTTATCTCATTACGAAATTTTCTCATTTAAG<br>ATTTTATTATTGTATTGATTTACTTTCTGTATTCTGTTTGTGTATAACAATCACTAACC  |
| YLR153C_dg fw           | ACATTACACGTAGCCACCCG                                                                                                        |
| YLR153C_dg rv           | ACCCCGTCACAGTGCATTAC                                                                                                        |
| ACS1_targetRNA FW ▾     | TGCGCATGTTTCGGCGTTCGAACTTCTCCGCAGTGAAAGATAAATGATCCATCAATAAT<br>ATCCAATAAGTTTTAGAGCTAGAAATAGCAAGTTAAAATAAGGCTAGTCCGTTATCAAC  |

You can select another target sequence by clicking on the dropdown symbol.

When you select another target sequence the oligonucleotides will automatically be updated. The first column displays the target sequence, the second any restriction sites that might be present in the target sequence, the next columns displays the AT content, RNA score (number of unpaired nucleotides in the first 20 nucleotides divided by 20), the cumulated score followed by a column displaying the RNA structure in the dot-bracket notation; dots are unpaired nucleotides, opening brackets are nucleotides paired with the corresponding closing bracket.

Loci View settings **Targets**

Fetches: YLR153C, ACS1

| Primer name            | Primer sequence (5' → 3')                                                                                                   |
|------------------------|-----------------------------------------------------------------------------------------------------------------------------|
| YLR153C_targetRNA FW ▾ | TGCGCATGTTTCGGCGTTCGAACTTCTCCGCAGTGAAAGATAAATGATCTTAGAGATCTACCAAG<br>AACAGTTTTAGAGCTAGAAATAGCAAGTTAAAATAAGGCTAGTCCGTTATCAAC |

  

| # | Target sequence                                          | Restriction enzymes | AT content | RNA score | Total score | RNA structure |
|---|----------------------------------------------------------|---------------------|------------|-----------|-------------|---------------|
| 0 | <input type="radio"/> TTAAGATTAATCAAACGTGTAGG            |                     | 0.75       | 0.95      | 1.94        | .....(        |
| 1 | <input checked="" type="radio"/> TTAGAGATCTACCAAGAACAAGG |                     | 0.65       | 1.00      | 1.78        | .....         |
| 2 | <input type="radio"/> AGATGCTTCAATTTCTGATGTGG            |                     | 0.65       | 1.00      | 1.78        | .....         |
| 3 | <input type="radio"/> ATATCTACCATAATCTGGGTAGG            |                     | 0.65       | 1.00      | 1.78        | .....         |
| 4 | <input type="radio"/> AGAATTGATCTTACAAGTTAGGG            |                     | 0.75       | 0.75      | 1.71        | ....((((..... |
| 5 | <input type="radio"/> TCTAATCCACACCTGTAACAGG             |                     | 0.60       | 1.00      | 1.67        | .....         |

Next to the primer(s) incorporating the target sequences also oligonucleotides are given that can be used to repair the double strand break. The forward repair oligo is 60 bp upstream of the start codon concatenated with 60 bp of the sequence downstream of the stop codon. The reverse repair oligo is the reverse complement of this sequence. Also diagnostic primers are given to confirm gene deletion.

Under the tab “View settings” you can change same parameters, as shown in the following screenshot (the oligonucleotides are automatically updated).

Yeastriction v0.1    Todo    Protocol    Cite    Register    Login

[Loci](#)    **View settings**    [Targets](#)

**Method**

Method 1 (one locus)

Method 2 (two loci)

**Ranking**

Presence of restriction sites

AT-content

Secondary gRNA structure

**Diagnostics**

Show diagnostic primers

# Protocol for gene editing using *in vivo* assembled plasmids containing single gRNAs

## Introduction

The *in vivo* recombination method can be used to introduce marker- and scarless genetic modifications, is highly efficient for the creation of single modifications and has the advantage of a very simple workflow prior to yeast transformation. When aiming for multiple simultaneous genetic modifications, the *in vitro* recombination method is recommended. This protocol describes preparation of the DNA required for transformation (step 1 to 4), transformation into yeast (step 5), confirmation of the correct genotype (step 6) and removal of the guideRNA plasmid (step 7).

## Steps

1. Design and order the guideRNA (gRNA) insert primers
  - a. Design the gRNA primer using the Yeastriction tool at <http://yeastriction.tnw.tudelft.nl>.
  - b. Alternatively, use the following complementary sequences as gRNA insert primers  
TGCGCATGTTTCGGCGTTCGAAACTTCTCCGCAGTGAAAGATAAATGATCN<sub>20</sub>GTTTTAGAGC  
TAGAAATAGCAAGTTAAAATAAG  
GTTGATAACGGACTAGCCTTATTTTAACTTGCTATTTCTAGCTCTAAAACN<sub>c20</sub>GATCATTTA  
TCTTTCACTGCGGAGAAGTTTCGAACGCCGAAACATGCGCA  
(where N<sub>20</sub> and N<sub>c20</sub> are the complementary target sequences without the PAM sequence).
  - c. Order the primers PAGE purified.
2. Construction of the double stranded gRNA insert
  - a. Dissolve the complementary gRNA insert primers in distilled water to a final concentration of 100 μM.
  - b. Mix the complementary primers in a 1:1 volume ratio.
  - c. Heat the mixture to 95 °C for 5 min and subsequently anneal both primers by cooling down to room temperature on the bench.

3. Construction of the linearized backbone

- a. Prepare a PCR reaction mixture as follows:

| Component          | Amount (μL) | Final concentration |
|--------------------|-------------|---------------------|
| HF buffer          | 10          |                     |
| dNTPs              | 1           | 200 μM              |
| Phusion polymerase | 0.5         | 0.02 U/μL           |
| pMEL template*     | 1           | 1-5 ng/μL           |
| Primer 6005        | 1           | 0.2 μM              |
| Primer 6006        | 1           | 0.2 μM              |
| Distilled water    | 35.5        |                     |
| Total              | 50          |                     |

\* this can be any pMEL plasmid

- b. Use the following conditions for the PCR

| Step | Temperature (°C) | Time  |          |
|------|------------------|-------|----------|
| 1    | 98               | 30 s  |          |
| 2    | 98               | 10 s  |          |
| 3    | 67               | 20 s  | 35 - 40x |
| 4    | 68               | 3 min |          |
| 5    | 68               | 5 min |          |
| 6    | 12               | ∞     |          |

- c. After the PCR is finished, restrict the PCR mixture with FastDigest DpnI (Thermo Scientific) for 30 minutes according to the manufacturer's manual.
  - d. After digestion, load the complete reaction mixture on a 1% agarose 1xTAE gel with Serva staining.
  - e. Excise the PCR product and purify using the ZymoClean Gel DNA recovery kit according to manufacturer's instructions.
4. Construction of dsDNA repair fragment
- a. When aiming for a markerless deletion
    - i. Use the Yeastriction tool at <http://yeastriction.tnw.tudelft.nl>.
    - ii. Alternatively, design complementary 120 bp primers comprised of 60 bp sequences homologous to up- and downstream regions of the chromosomal target site, the sequence omitted between the up- and downstream regions will be removed from the chromosome during transformation.
    - iii. Order the primers DST purified.
    - iv. Anneal both primers as described in step 2.
  - b. When aiming for mutations
    - i. Design complementary 120 bp primers homologous to the 120 bp sequence around the chromosomal target site, introducing the desired mutation(s) in the 20 bp gRNA recognition sequence.
    - ii. Order the primers PAGE purified.
    - iii. Anneal both primers as described in step 2.
  - c. When aiming for an integration
    - i. Design primers for amplification of the desired DNA fragment for integration and add 60 bp 5' tails homologous to up- and downstream regions of the chromosomal target site, the sequence omitted between the up- and downstream regions will be replaced by the integration fragment during transformation.
    - ii. Order the primers PAGE purified.
    - iii. PCR amplify the insert fragment using Phusion polymerase.
    - iv. After the PCR is finished, load the complete reaction mixture on a 1% agarose 1xTAE gel with Serva staining.
    - v. Excise the PCR product and purify using the ZymoClean Gel DNA recovery kit according to manufacturer's instructions.

5. Yeast transformation

- a. Prepare the following transformation mix:

| <b>Component</b>      | <b>Amount</b> |
|-----------------------|---------------|
| Linearized backbone   | 100 ng        |
| dsgRNA insert         | 300 ng        |
| dsDNA repair fragment | 0.2 - 1 µg    |
| PEG                   | 240 µL        |
| 1 M LiAc              | 36 µL         |
| ssDNA                 | 25 µL         |
| Distilled water       | X µL          |
| <b>Total</b>          | <b>351 µL</b> |

- b. Transform *S. cerevisiae* with this mixture, according to the protocol of Gietz and Woods (Gietz *et al.*, 2002).

## 6. Confirmation of correct genetic modification

### a. DNA isolation (Löoke *et al.*, 2011)

- i. Pick a yeast colony into 100  $\mu\text{L}$  0.2 M lithium acetate containing 1% SDS.
- ii. Alternatively, spin down 100  $\mu\text{L}$  of a grown yeast culture in liquid medium, remove supernatant and resuspended in 100  $\mu\text{L}$  0.2 M lithium acetate containing 1% SDS.
- iii. Heat to 75  $^{\circ}\text{C}$  for 10 min.
- iv. Add 300  $\mu\text{L}$  100% ethanol and vortex.
- v. Spin down at maximum speed for 3 minutes and remove supernatant.
- vi. Resuspend the pellet in 150  $\mu\text{L}$  70% ethanol.
- vii. Spin down at maximum speed for 3 minutes and remove supernatant.
- viii. Dry the pellet at 37  $^{\circ}\text{C}$ , leaving the tube open.
- ix. Add 50-100  $\mu\text{L}$  distilled water and vortex thoroughly.
- x. Spin down at maximum speed for 1 minute.
- xi. Use the supernatant directly as template for PCR.

### b. Design and order verification primers

- i. Using the Yeastriction tool at <http://yeastriction.tnw.tudelft.nl>.
- ii. Alternatively, design 20-30 bp forward and reverse primers, of which the resulting PCR product covers relevant homologous recombination sites to confirm correct DNA integration events during transformation.
- iii. Order the primers DST purified.

### c. Prepare a PCR reaction mixture as follows:

| Component              | Amount ( $\mu\text{L}$ ) | Final concentration |
|------------------------|--------------------------|---------------------|
| DreamTaq MasterMix     | 10                       |                     |
| Template DNA (step 6a) | 1-9                      |                     |
| Forward primer         | 0.5                      | 0.25 $\mu\text{M}$  |
| Reverse primer         | 0.5                      | 0.25 $\mu\text{M}$  |
| Distilled water        |                          |                     |
| Total                  | 20                       |                     |

### d. Use the following conditions for the PCR:

| Step | Temperature ( $^{\circ}\text{C}$ ) | Time     |     |
|------|------------------------------------|----------|-----|
| 1    | 95                                 | 4 min    |     |
| 2    | 95                                 | 30 s     |     |
| 3    | 55                                 | 30 s     | 40x |
| 4    | 72                                 | 1 min/kb |     |
| 5    | 72                                 | 10 min   |     |
| 6    | 12                                 | $\infty$ |     |

## 7. Plasmid removal

### a. Inoculate the confirmed culture in 25 mL of non-selective liquid medium

- i. When using auxotrophic markers this can be achieved by growing the cells on rich medium such as yeast peptone (YP) medium or via addition of the appropriate nutrients to synthetic medium and if possible compounds resulting in counterselection.
- ii. When using dominant markers this can be achieved by simply omitting or replacing the components associated with the dominant marker from the medium.

### b. Incubate the culture at 30 $^{\circ}\text{C}$ until the exponential growth phase is finished.

- i. The time required to achieve depletion of the carbon source heavily varies based on the strain background and medium composition.

### c. Streak part of the culture on a non-selective agar plates and incubate at 30 $^{\circ}\text{C}$ until single colonies are clearly visible.



- d. Re-streak the obtained single colonies on non-selective plates and selective plates to confirm removal of the gRNA plasmid.
- e. Transfer colonies that grow on non-selective, but not on selective medium agar plates to 20 mL non-selective liquid medium.
- f. After sufficient cell growth, the culture can be stocked and stored at -80 °C and used for another round of transformation

# Protocol for multiplexed gene editing using *in vitro* assembled plasmids containing two gRNAs

---

## Introduction

Using this protocol, first a plasmid is constructed containing two guideRNAs facilitating restriction at two loci (step 1 to 5). After confirmation of the plasmid (step 6), it is transformed into yeast (step 7 to 8) with the appropriate repair fragments (step 2), following confirmation of the correct genotype (step 9) and removal of the guideRNA plasmid (step 10).

## Steps

1. Design and order the guideRNA (gRNA) primers
  - a. Design the gRNA primer using the Yeastriction tool at <http://yeastriction.tnw.tudelft.nl>.
  - b. Alternatively, use the following sequence as gRNA primer  
TGCGCATGTTTCGGCGTTCGAAACTTCTCCGCAGTGAAAGATAAAATGATCN<sub>20</sub>GTTTTAGAGC  
TAGAAATAGCAAGTTAAAATAAG  
(where N<sub>20</sub> is the target sequence without the PAM sequence, choosing a target site that contains a restriction site facilitates confirmation by restriction enzymes later on).
  - c. Order the primer PAGE purified.
2. Construction of dsDNA repair fragment
  - a. When aiming for markerless deletions
    - i. Use the Yeastriction tool at <http://yeastriction.tnw.tudelft.nl>.
    - ii. Alternatively, design complementary 120 bp primers comprised of 60 bp sequences homologous to up- and downstream regions of the chromosomal target site, the sequence omitted between the up- and downstream regions will be removed from the chromosome during transformation.
    - iii. Order the primers DST purified.
    - iv. Dissolve the complementary primers in distilled water to a final concentration of 100µM.
    - v. Mix the complementary primers in a 1:1 volume ratio.
    - vi. Heat the mixture to 95 °C for 5 min and subsequently anneal both primers by cooling down to room temperature on the bench.
  - b. When aiming for mutations
    - i. Design complementary 120 bp primers homologous to the 120 bp sequence around the chromosomal target site, introducing the desired mutation(s) in the 20 bp gRNA recognition sequence.
    - ii. Order the primers PAGE purified.
    - iii. Anneal both primers as described in step 2a.
  - c. When aiming for an integration
    - i. Design primers for amplification of the desired DNA fragment for integration and add 60 bp 5' tails homologous to up- and downstream regions of the chromosomal target site, the sequence omitted between the up- and downstream regions will be replaced by the integration fragment during transformation.
    - ii. Order the primers PAGE purified.
    - iii. PCR amplify the insert fragment using Phusion polymerase.
    - iv. After the PCR is finished, load the complete reaction mixture on a 1% agarose 1xTAE gel with Serva staining.

- v. Excise the PCR product and purify using the ZymoClean Gel DNA recovery kit according to manufacturer's instructions.

3. Construction of the 2 $\mu$ m fragment

- a. Set-up a PCR reaction for production of the 2 $\mu$ m fragment as follows:

(We use DreamTaq (left column) and Phusion (right column) interchangeably)

| <b>DreamTaq</b>          |                                   | <b>Phusion</b>           |                                   |                            |
|--------------------------|-----------------------------------|--------------------------|-----------------------------------|----------------------------|
| <b>Component</b>         | <b>Amount (<math>\mu</math>L)</b> | <b>Component</b>         | <b>Amount (<math>\mu</math>L)</b> | <b>Final concentration</b> |
| DreamTaq                 | 50                                | HF buffer                | 20                                |                            |
| MasterMix                |                                   | dNTPs                    | 2                                 | 200 $\mu$ M                |
|                          |                                   | Phusion                  | 1.5                               | 0.03 U/ $\mu$ L            |
| pROS template*           | 80 ng                             | pROS template*           | 80 ng                             |                            |
| gRNA primer 1 $\text{¥}$ | 2                                 | gRNA primer 1 $\text{¥}$ | 2                                 | 0.2 $\mu$ M                |
| gRNA primer 2 $\text{¥}$ | 2                                 | gRNA primer 2 $\text{¥}$ | 2                                 | 0.2 $\mu$ M                |
| Distilled water          | X                                 | Distilled water          | X                                 |                            |
| Total volume             | 100                               | Total volume             | 100                               |                            |

\* this can be any pROS plasmid

$\text{¥}$  as design in step 1a or 1b

- b. Divide the 100  $\mu$ L reaction mixture in two PCR tubes.

- c. Use the following conditions for the PCR:

| <b>DreamTaq</b> |                                             |             |     | <b>Phusion</b> |                                             |             |     |
|-----------------|---------------------------------------------|-------------|-----|----------------|---------------------------------------------|-------------|-----|
| <b>Step</b>     | <b>Temperature (<math>^{\circ}</math>C)</b> | <b>Time</b> |     | <b>Step</b>    | <b>Temperature (<math>^{\circ}</math>C)</b> | <b>Time</b> |     |
| 1               | 95                                          | 4 min       |     | 1              | 98                                          | 3 min       |     |
| 2               | 95                                          | 30 s        |     | 2              | 98                                          | 30 s        |     |
| 3               | 55                                          | 30 s        | 40x | 3              | 69                                          | 30 s        | 40x |
| 4               | 66                                          | 2 min       |     | 4              | 72                                          | 3 min       |     |
| 5               | 66                                          | 10 min      |     | 5              | 72                                          | 10 min      |     |
| 6               | 12                                          | $\infty$    |     | 6              | 12                                          | $\infty$    |     |

- d. After the PCR is finished, load the complete reaction mixture on a 1% agarose 1xTAE gel with Serva staining.

- e. Excise the 1589 bp PCR product on a Safe Imager™ 2.0 Blue-Light Transilluminator (Life Technologies) and purify using the ZymoClean Gel DNA recovery kit (Zymoclean™, D2004, Zymo Research, Irvine, CA) according to manufacturer's instructions.

4. Construction of the linearized backbone

- a. Prepare a PCR reaction mixture as follows:

| <b>Component</b>   | <b>Amount (<math>\mu</math>L)</b> | <b>Final concentration</b> |
|--------------------|-----------------------------------|----------------------------|
| HF buffer          | 10                                |                            |
| dNTPs              | 1                                 | 200 $\mu$ M                |
| Phusion polymerase | 0.75                              | 0.03 U/ $\mu$ L            |
| pROS template*     | 80 ng                             |                            |
| primer 6005        | 2                                 | 0.4 $\mu$ M                |
| Distilled water    | X                                 |                            |
| Total volume       | 50                                |                            |

\* this can be any pROS plasmid

- b. Use the following conditions for the PCR

| <b>Step</b> | <b>Temperature (<math>^{\circ}</math>C)</b> | <b>Time</b> |        |
|-------------|---------------------------------------------|-------------|--------|
| 1           | 98                                          | 3 min       |        |
| 2           | 98                                          | 30 s        |        |
| 3           | 63                                          | 30 s        | 35-40x |
| 4           | 68                                          | 2 min       |        |

|   |    |        |
|---|----|--------|
| 5 | 68 | 10 min |
| 6 | 12 | ∞      |

- c. After the PCR is finished, restrict the PCR mixture with FastDigest DpnI (Thermo Scientific) for 30 minutes according to the manufacturer's manual.
- d. After digestion, load the complete reaction mixture on a 1% agarose 1xTAE gel with Serva staining.
- e. Excise the PCR product and purify using the ZymoClean Gel DNA recovery kit according to manufacturer's instructions.

5. Assembly the 2 $\mu$ m fragment with the backbone using Gibson Assembly

- a. Prepare the following Gibson Assembly reaction mixture:

| Component                  | Amount     |
|----------------------------|------------|
| Gibson Assembly MasterMix* | 5 $\mu$ L  |
| 2 $\mu$ m fragment         | 100 ng     |
| backbone                   | 100 ng     |
| Distilled water            | X $\mu$ L  |
| Total                      | 10 $\mu$ L |

\* New England Biolabs

- b. Incubate the reaction mixture at 50 °C for 1 hour in a thermocycler.
- c. After the reaction is finished, add 20  $\mu$ L of distilled water and transform 2  $\mu$ L to DH5 $\alpha$  *E. coli* using electroporation in a 2 mm cuvette (165-2086, BioRad, Hercules, CA) with a Gene PulserXcell Electroporation System (BioRad), following the manufacturer's protocol.
- d. Plate *E. coli* cells on LB with 100 mg $\cdot$ L<sup>-1</sup> ampicillin
- e. After incubating ~18 h at 37 °C pick ~4-6 colonies and transfer to 15 mL BD Falcon tubes containing 4 mL of liquid LB with 100 mg $\cdot$ L<sup>-1</sup> ampicillin
- f. Incubate ~18 h at 37 °C in a shaker

6. Confirmation of constructed plasmid

- a. Extract the plasmids from 2 mL of *E. coli* culture using the Sigma GenElute Plasmid kit (Sigma-Aldrich), according to the supplier's manual (after confirmation, the remaining 2 mL may be used for stocking)
- b. Elute the plasmid with 60  $\mu$ L of buffer instead of 100  $\mu$ L
- c. Confirm the plasmid with either restriction analysis or diagnostic PCR

- i. Confirmation using restriction analysis

- a. If the target sequence contains a restriction site, this may be used to confirm the plasmid.

- b. Design restriction experiment

▲ Be aware that there are 4 different PCR products of the 2 $\mu$ m fragment:

1. [target\_sequence\_1]-[2 $\mu$ m]-[target\_sequence\_1]
2. [target\_sequence\_1]-[2 $\mu$ m]-[target\_sequence\_2]
3. [target\_sequence\_2]-[2 $\mu$ m]-[target\_sequence\_1]
4. [target\_sequence\_2]-[2 $\mu$ m]-[target\_sequence\_2]

Moreover, the 2 $\mu$ m fragment can be oriented in two directions. So there are 8 different possible plasmids, of which 4 are of the desired architecture.

- c. Use the following recipe:

| Component                | Amount     |
|--------------------------|------------|
| FastDigest Green Buffer* | 2 $\mu$ L  |
| Plasmid                  | 500 ng     |
| FastDigest Enzyme(s)*    | 1 $\mu$ L  |
| Distilled water          | X $\mu$ L  |
| Total                    | 20 $\mu$ L |

\* ThermoScientific

- d. After incubating for ~30 minutes at the temperature specified by the manufacturer, load the entire reaction mix on a 1% agarose 1x TAE gel with Serva staining.
- e. Confirm correct plasmid assembly by visualizing bands using the UV transillumination G-Box (Syngene)
- ii. Alternatively, use PCR to confirm correct plasmid assembly
  - a. Design primers that are complementary to the target sequence (see Figure 1, primer  $\alpha$  and primer  $\beta$ , for, respectively, target sequence 1 and 2)
  - b. For every plasmid use the following two PCR reactions:

|                   | <b>Component</b>   | <b>Amount (<math>\mu\text{L}</math>)</b> | <b>Final concentration</b> |
|-------------------|--------------------|------------------------------------------|----------------------------|
| <b>Reaction 1</b> | DreamTaq MasterMix | 10                                       |                            |
|                   | plasmid            | 3                                        |                            |
|                   | Primer $\alpha$    | 0.5                                      | 0.25 $\mu\text{M}$         |
|                   | Primer A*          | 0.5                                      | 0.25 $\mu\text{M}$         |
|                   | Primer B*          | 0.5                                      | 0.25 $\mu\text{M}$         |
|                   | Distilled water    | x                                        |                            |

\* For the sequences of primer A and B see Table 1. These primers can be used for confirmation of any pROS plasmid.

And

|                   | <b>Component</b>   | <b>Amount (<math>\mu\text{L}</math>)</b> | <b>Final concentration</b> |
|-------------------|--------------------|------------------------------------------|----------------------------|
| <b>Reaction 2</b> | DreamTaq MasterMix | 10                                       |                            |
|                   | plasmid            | 3                                        |                            |
|                   | Primer $\beta$     | 0.5                                      | 0.25 $\mu\text{M}$         |
|                   | Primer A           | 0.5                                      | 0.25 $\mu\text{M}$         |
|                   | Primer B           | 0.5                                      | 0.25 $\mu\text{M}$         |
|                   | Distilled water    | x                                        |                            |

- c. Run the PCR, following this procedure:

| <b>Step</b> | <b>Temperature (<math>^{\circ}\text{C}</math>)</b> | <b>Time</b> |     |
|-------------|----------------------------------------------------|-------------|-----|
| 1           | 95                                                 | 4 min       |     |
| 2           | 95                                                 | 30 s        |     |
| 3           | 55                                                 | 30 s        | 35x |
| 4           | 72                                                 | 30 s        |     |
| 5           | 72                                                 | 10 min      |     |
| 6           | 12                                                 | $\infty$    |     |

- d. Load the PCR reaction mixture on a 1% agarose 1xTAE gel with Serva staining
- e. Confirm correct plasmid assembly by visualizing bands using UV transillumination equipment
  - ▲ If the plasmid shows the architecture as shown in figure 1A, one band at 379 bp is expected for reaction 1, and at 552 bp for reaction 2. If the situation is as in Figure 1B, the fragment for reaction 1 should be 552 bp and for reaction 2 379 bp. If the plasmid is as in Figure 1C, two fragments are expected with reaction 1, at 379 bp and 552 bp (and no bands for reaction 2). If the plasmid is as Figure 1D, no bands are expected for reaction 1 and two bands for reaction 2, at 379 bp and 552 bp.

7. Inoculate the correct clone to 20 mL LB with 100  $\text{mg}\cdot\text{L}^{-1}$  ampicillin in a 50 mL erlenmeyer, ensuring sufficient aeration
  - a. Spin down the 20 mL of culture in Falcon tubes.

- b. Resuspend the cell pellet with 800  $\mu\text{L}$  of resuspension buffer and divide in two 1.5 mL reaction tubes.
- c. Follow the rest of the Sigma GenElute Plasmid kit (Sigma-Aldrich) protocol, with the following modifications:
  - i. Adjust the volume of lysis buffer and neutralization buffer to 400  $\mu\text{L}$  and 700  $\mu\text{L}$ , respectively.
  - ii. Per reaction tube, load the reaction mixture in two steps of 750  $\mu\text{L}$  to a column
  - iii. Elute with 30  $\mu\text{L}$

8. Yeast transformation

- a. Prepare the dsDNA repair fragment as in step 2.
- b. Prepare the following transformation mix:

| Component             | Amount                |
|-----------------------|-----------------------|
| Plasmid               | 2 $\mu\text{g}$       |
| dsDNA repair fragment | 1 - 2.5 $\mu\text{g}$ |
| PEG                   | 240 $\mu\text{L}$     |
| 1 M LiAc              | 36 $\mu\text{L}$      |
| ssDNA                 | 25 $\mu\text{L}$      |
| Distilled water       | X $\mu\text{L}$       |
| Total                 | 351 $\mu\text{L}$     |

- c. Transform *S. cerevisiae* with this mixture, according to the protocol of Gietz and Woods (Gietz *et al.*, 2002).

9. Confirmation of correct genetic modification

- a. DNA isolation (Lõoke *et al.*, 2011)
  - i. Pick a yeast colony into 100  $\mu\text{L}$  0.2 M lithium acetate containing 1% SDS.
  - ii. Alternatively, spin down 100  $\mu\text{L}$  of a grown yeast culture in liquid medium, remove supernatant and resuspend in 100  $\mu\text{L}$  0.2 M lithium acetate containing 1% SDS.
  - iii. Heat to 75°C for 10 min.
  - iv. Add 300  $\mu\text{L}$  100% ethanol and vortex.
  - v. Spin down at maximum speed for 3 minutes and remove supernatant.
  - vi. Resuspend the pellet in 150  $\mu\text{L}$  70% ethanol.
  - vii. Spin down at maximum speed for 3 minutes and remove supernatant.
  - viii. Dry the pellet at 37 °C, leaving the tube open.
  - ix. Add 50-100  $\mu\text{L}$  distilled water and vortex thoroughly.
  - x. Spin down at maximum speed for 1 minute.
  - xi. Use the supernatant directly as template for PCR.
- b. Design and order verification primers
  - i. Using the Yeastriction tool at <http://yeastriction.tnw.tudelft.nl>.
  - ii. Alternatively, design 20-30 bp forward and reverse primers, of which the resulting PCR product covers relevant homologous recombination sites to confirm correct DNA integration events during transformation.
  - iii. Order the primers desalted.

- c. Prepare a PCR reaction mixture as follows:

| Component              | Amount ( $\mu\text{L}$ ) | Final concentration |
|------------------------|--------------------------|---------------------|
| DreamTaq MasterMix     | 10                       |                     |
| Template DNA (step 6a) | 1-9                      |                     |
| Forward primer         | 0.5                      | 0.25 $\mu\text{M}$  |
| Reverse primer         | 0.5                      | 0.25 $\mu\text{M}$  |
| Distilled water        |                          |                     |
| Total                  | 20                       |                     |

- d. Use the following conditions for the PCR:

| Step | Temperature (°C) | Time |
|------|------------------|------|
|      |                  |      |

|   |    |          |     |
|---|----|----------|-----|
| 1 | 95 | 4 min    |     |
| 2 | 95 | 30 s     |     |
| 3 | 55 | 30 s     | 40x |
| 4 | 72 | 1 min/kb |     |
| 5 | 72 | 10 min   |     |
| 6 | 12 | ∞        |     |

## 10. Plasmid removal

- a. Inoculate the confirmed culture in 25 mL of non-selective liquid medium
  - i. When using auxotrophic markers this can be achieved by growing the cells on rich medium such as yeast peptone (YP) medium or via addition of the appropriate nutrients to synthetic medium.
  - ii. When using dominant markers this can be achieved by simply omitting or replacing the components associated with the dominant marker from the medium.
- b. Incubate the culture at 30 °C until the exponential growth phase is finished.
  - i. The time required to achieve depletion of the carbon source heavily varies based on the strain background and medium composition.
- c. Steak part of the culture on a non-selective agar plates and incubate at 30 °C until single colonies are clearly visible.
- d. Re-steak the obtained single colonies on non-selective plates and selective plates to confirm removal of the gRNA plasmid.
- e. Transfer colonies that grow on non-selective, but not on selective medium agar plates to 20 mL non-selective liquid medium.
- f. After sufficient cell growth, the culture can be stocked and stored at -80 °C and used for another round of transformation.

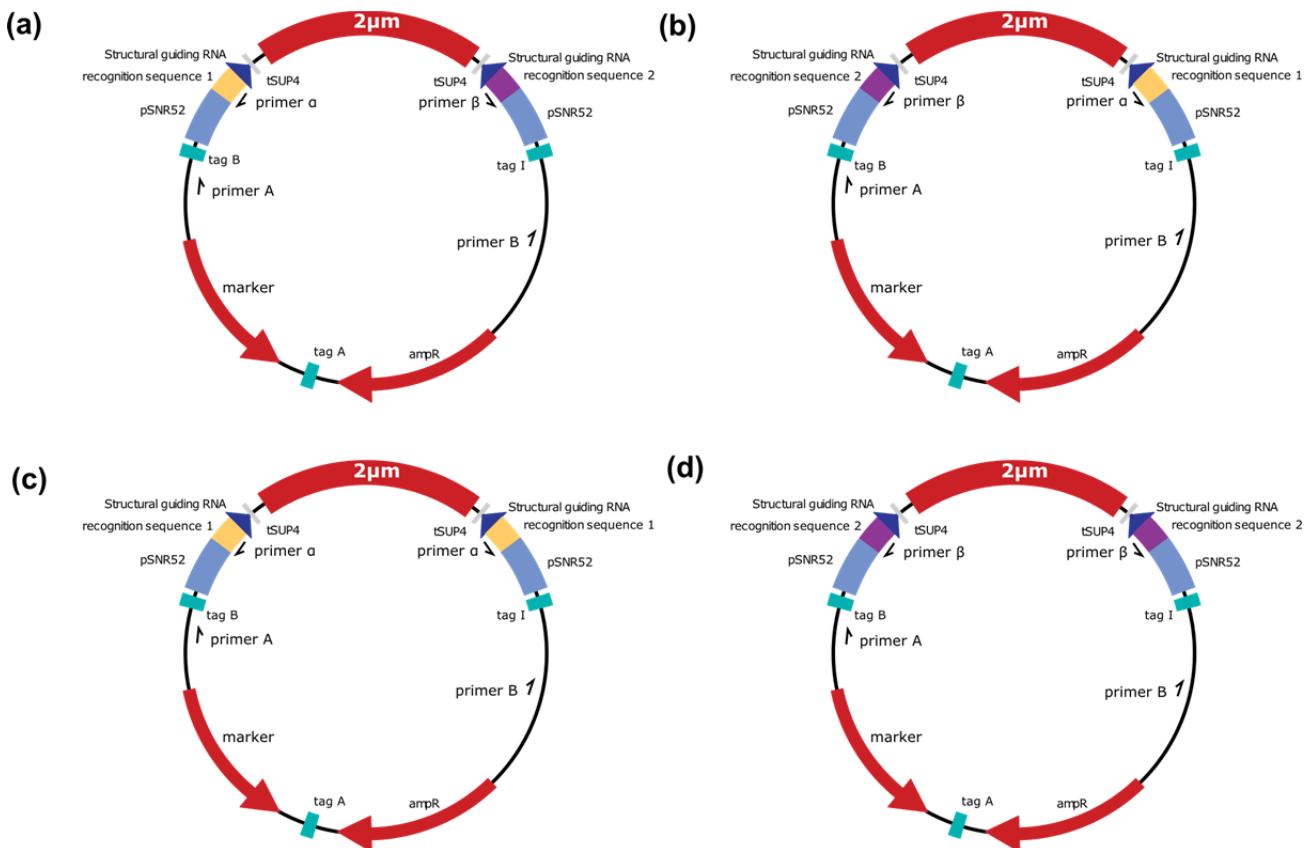

**Figure 1**

When using the double gRNA approach to assemble the fragment [target\_sequence\_1 or 2]-[2µm]-[target\_sequence\_1 or 2] with backbone there are eight possible end products. **(a)** [target\_sequence\_1]-[2µm]-[target\_sequence\_2] **(b)** [target\_sequence\_2]-[2µm]-[target\_sequence\_1] **(c)** [target\_sequence\_1]-[2µm]-[target\_sequence\_1] **(d)** [target\_sequence\_2]-[2µm]-[target\_sequence\_2]

2]. The four other possible assemblies are the same to A – D, except that the 2µm fragment is in reverse.

**Table 1**

| Name     | Sequence 5' → 3'     |
|----------|----------------------|
| Primer A | CACCTTTCGAGAGGACGATG |
| Primer B | GCTGGCCTTTTGCTCACATG |

## References

- Gietz DR & Woods RA (2002) Transformation of yeast by lithium acetate/single-stranded carrier DNA/polyethylene glycol method. *Methods Enzymol* **350**: 87–96.
- Lööke M, Kristjuhan K & Kristjuhan A (2011) Extraction of genomic DNA from yeasts for PCR-based applications. *Biotechniques* **50**: 325–328.



# Supplementary Table S1

## Primers used in this study

| Number                               | Name                                  | Sequence 5' → 3'                                                                                                 |
|--------------------------------------|---------------------------------------|------------------------------------------------------------------------------------------------------------------|
| <b>CAS9 integration</b>              |                                       |                                                                                                                  |
| 2873                                 | CAN1DelcassFW                         | TCAGACTTCTTAACCTCCTGTAAAAACAAAAAAAAAAAAAAAAAGGCATAGCAATA<br>AGCTGGAGCTCATAGCTTC                                  |
| 3093                                 | tagA-pUG                              | ACTATATGTGAAGGCATGGCTATGGCACGGCAGACATTCGCCCAGATCATC<br>AATAGGCACCTTCGTACGCTGCAGGTCGAC                            |
| 4653                                 | A-CYC1t-rv                            | GTGCCCTATTGATGATCTGGCGGAATGTCTGCCGTGCCATAGCCATGCCTTC<br>ACATATAGTCCGCAAATTTAAAGCCTTCGAG                          |
| 5542                                 | CAN1 KO rv                            | CTATGTACAACATTTCCAAAATTTGTCCCAAAAAGTCTTTGGTTTCATGATC<br>TTCCCATACGCATAGGCCACTAGTGGATCTG                          |
| <b>Cas9 integration confirmation</b> |                                       |                                                                                                                  |
| 5829                                 | CAN1 cut rv                           | AGAAGAGTGGTTGCGAACAGAG                                                                                           |
| 2673                                 | m-PCR-HR4-RV                          | TGAAGTGGTACGGCGATGC                                                                                              |
| 2668                                 | m-PCR-HR2-FW                          | ACGCGTGTACGCATGTAAC                                                                                              |
| 9                                    | KanA                                  | CGCACGTCAAGACTGTCAAG                                                                                             |
| 2620                                 | Nat Ctrl Fw                           | GCCGAGCAAATGCCTGCAAATC                                                                                           |
| 2615                                 | Can1RV                                | GAAATGGCGTGGGAATGTGA                                                                                             |
| <b>Construction pMEL series</b>      |                                       |                                                                                                                  |
| 3093                                 | tagA-pUG                              | ACTATATGTGAAGGCATGGCTATGGCACGGCAGACATTCGCCCAGATCATC<br>AATAGGCACCTTCGTACGCTGCAGGTCGAC                            |
| 3096                                 | tagB-pUG                              | GTTGAACATTCTTAGGCTGGTTCGAATCATTTAGACACGGGCATCGTCCTCT<br>CGAAAGGTGGCATAGGCCACTAGTGGATCTG                          |
| 6845                                 | p426 cRNA-rv A                        | GTGCCCTATTGATGATCTGGCGGAATGTCTGCCGTGCCATAGCCATGCCTTC<br>ACATATAGTACAGGCAACACGCAGATATAGG                          |
| 6846                                 | p426 cRNA-fw B                        | CACCTTTCGAGAGGACGATGCCCGTGTCTAAATGATTTCGACCAGCCTAAGA<br>ATGTTCAACGGCCCACTACGTGAACCATC                            |
| 6847                                 | pRS Marker fw A                       | ACTATATGTGAAGGCATGGCTATGGCACGGCAGACATTCGCCCAGATCATC<br>AATAGGCACCTGCAGGCATCAGAGCAGATTG                           |
| 6848                                 | pRS Marker rv B                       | GTTGAACATTCTTAGGCTGGTTCGAATCATTTAGACACGGGCATCGTCCTCT<br>CGAAAGGTGCATCTGTGCGGTATTTACACC                           |
| 6005                                 | p426 CRISPR rv                        | GATCATTATCTTTCACTGCGGAGAAG                                                                                       |
| 6006                                 | p426 CRISPR fw                        | GTTTTAGAGCTAGAAATAGCAAGTTAAAATAAGGCTAGTC                                                                         |
| <b>Construction pROS series</b>      |                                       |                                                                                                                  |
| 5972                                 | tSUP4 rv ol 2mu-5*                    | GTTCTACAAAATGAAGCACAGATGCTTCGTTGGAGGGCGTGAACGTAAG                                                                |
| 5974                                 | 2mu inside fw                         | TACTTTTGAGCAATGTTTGTGGA                                                                                          |
| 5975                                 | 2mu inside rv                         | AACGAGCTACTAAAATATTTGCGAA                                                                                        |
| 6007                                 | struct-guideRNA ADE2.y<br>(ol pSNR52) | GTGCGCATGTTTTCGGCTTCGAAACTTCTCCGCAAGTAAAGATAAATGATC<br>ACTTGAAGATTCTTTAGTGTGTTTTAGAGCTAGAAATAGCAAGTTAAAATA<br>AG |
| 6008                                 | struct-guideRNA CAN1.y<br>(ol pSNR52) | GTGCGCATGTTTTCGGCTTCGAAACTTCTCCGCAAGTAAAGATAAATGATC<br>GATACGTTCTCTATGGAGGAGTTTTAGAGCTAGAAATAGCAAGTTAAAATA<br>AG |
| 3289                                 | Fus Tag F fw                          | CATACGTTGAAACTACGGCAAAGG                                                                                         |
| 4692                                 | Fus Tag G rv                          | AAGGGCCATGACCACCTG                                                                                               |
| 5976                                 | pSNR52 fw ol tag I-2                  | GCCTACGGTTCGCCAAGTATGCTGCTGATGTCTGGCTATACCTATCCGTCT<br>ACGTGAATACCCTCACTAAAGGGAACAAAAG                           |
| 5977                                 | pSNR52 fw ol tag B                    | CACCTTTCGAGAGGACGATGCCCGTGTCTAAATGATTTCGACCAGCCTAAGA<br>ATGTTCAACCCCTCACTAAAGGGAACAAAAG                          |
| 5973                                 | tSUP4 rv ol 2mu 3*                    | GGCATAGTGGTGTGTTTATGCTTAAATGCGTGGAGGGCGTGAACGTAAG                                                                |
| 5975                                 | 2mu inside rv                         | AACGAGCTACTAAAATATTTGCGAA                                                                                        |
| 4068                                 | Nic1 amp Fwd                          | GCCTACGGTTCGCCAAGTATGC                                                                                           |
| 5974                                 | 2mu inside fw                         | TACTTTTGAGCAATGTTTGTGGA                                                                                          |
| 3841                                 | for f3h                               | CACCTTTCGAGAGGACGATG                                                                                             |
| 3847                                 | FUS Tag A fw                          | ACTATATGTGAAGGCATGGCTATGG                                                                                        |
| 3276                                 | Fus Tag B-rv                          | GTTGAACATTCTTAGGCTGGTTCGAATC                                                                                     |
| 3274                                 | Fus Tag I-fw                          | TATTCACGTAGACGGATAGGTATAGC                                                                                       |
| 3275                                 | Fus Tag A-rv                          | GTGCCCTATTGATGATCTGGCGGAATG                                                                                      |
| 5793                                 | pCAS9 rv                              | GATCATTATCTTTCACTGCGGAG                                                                                          |
| <b>Construction PDH cassettes</b>    |                                       |                                                                                                                  |
| 5654                                 | D_FW_E1a                              | GAATTCACGCATCTACGACTG                                                                                            |
| 7426                                 | tTEF1_yeast ol tACS2                  | GAAAATAGAAAACAGAAAAGGAGCGAAAATTTTATCTCATTACGAAAATTTT<br>CTCATTTAAGGAGGCATATTACTGATGTGATTTTC                      |
| 3277                                 | Fus Tag C rv                          | CTAGCGTGTCTCGCATAGTTCTTAGATTG                                                                                    |
| 7338                                 | pTDH3 fw ol tag I                     | TATTCACGTAGACGGATAGGTATAGCCAGACATCAGCAGCATACTTCGGGA                                                              |

3284 Fus Tag J rv ACCGTAGGCATAAAAAACACGCTTTTTTCAGTTTC  
 7356 tPGI1 ol pACS2 CGACGAGATGCTCAGACTATGTGTTC  
 5653 D\_RV\_E3 GGTTAGTGATTGTTATACACAAACAGAATACAGGAAAGTAAATCAATACAA  
 3283 Fus Tag C fw TAATAAAATTAATTTTTTAAATTTTTTACTTTTTCGCGAC  
 5661 I\_RV\_LL.LA1 AAGCTTAATCACTCTCCATACAGGG  
 5663 H\_FW\_LA1 ACGTCTCACGGATCGTATATGC  
 2686 Tag H fusion reverse TCTAGAGCCTACGGTTCCTCGA  
 3285 Fus Tag J fw GTCACGGGTTCTCAGCAATTCG  
 GGCCGTCATATACGCGAAGATGTC

**gRNA cassette construction**

6835 CrRNA insert MCH1 XhoI FW TGCGCATGTTTCGGCGTTCGAAACTTCTCCGCAGTGAAAGATAAATGATCT  
 ATTTGGCAATAAACATCTCGGTTTTAGAGCTAGAAATAGCAAGTTAAAATAA  
 GGCTAGTCCGTTATCAAC  
 6836 CrRNA insert MCH1 XhoI RV GTTGATAACGGACTAGCCTTATTTTAACTTGCTATTTCTAGCTCTAAAACC  
 GAGATGTTTATTGCCAATAGATCATTATCTTTCACTGCGGAGAAGTTTTCG  
 AACGCCGAAACATGCGCA  
 6837 CrRNA insert MCH2 PvuI FW TGCGCATGTTTCGGCGTTCGAAACTTCTCCGCAGTGAAAGATAAATGATCA  
 TCTCGATCGAGGTGCCTGAGTTTTAGAGCTAGAAATAGCAAGTTAAAATAA  
 GGCTAGTCCGTTATCAAC  
 6838 CrRNA insert MCH2 PvuI RV GTTGATAACGGACTAGCCTTATTTTAACTTGCTATTTCTAGCTCTAAAACC  
 CAGGCACCTCGATCGAGATGATCATTATCTTTCACTGCGGAGAAGTTTTCG  
 AACGCCGAAACATGCGCA  
 6839 CrRNA insert MCH5 EcoRV FW TGCGCATGTTTCGGCGTTCGAAACTTCTCCGCAGTGAAAGATAAATGATCA  
 CTCTTCGGTTTTAGATATCGTTTTAGAGCTAGAAATAGCAAGTTAAAATAA  
 GGCTAGTCCGTTATCAAC  
 6840 CrRNA insert MCH5 EcoRV RV GTTGATAACGGACTAGCCTTATTTTAACTTGCTATTTCTAGCTCTAAAACC  
 ATATCTAAAACGGAAGATGATCATTATCTTTCACTGCGGAGAAGTTTTCG  
 AACGCCGAAACATGCGCA  
 6841 CrRNA insert AQY1 DraI FW TGCGCATGTTTCGGCGTTCGAAACTTCTCCGCAGTGAAAGATAAATGATCA  
 CCATCGCTTTAAAATCTCTGTTTTAGAGCTAGAAATAGCAAGTTAAAATAA  
 GGCTAGTCCGTTATCAAC  
 6842 CrRNA insert AQY1 DraI RV GTTGATAACGGACTAGCCTTATTTTAACTTGCTATTTCTAGCTCTAAAACA  
 GAGATTTTAAAGCGATGTTGATCATTATCTTTCACTGCGGAGAAGTTTTCG  
 AACGCCGAAACATGCGCA  
 6843 CrRNA insert ITRI EcoRI FW TGCGCATGTTTCGGCGTTCGAAACTTCTCCGCAGTGAAAGATAAATGATCA  
 TACATCAACGAATCCAACGTTTTAGAGCTAGAAATAGCAAGTTAAAATAA  
 GGCTAGTCCGTTATCAAC  
 6844 CrRNA insert ITRI EcoRI RV GTTGATAACGGACTAGCCTTATTTTAACTTGCTATTTCTAGCTCTAAAACC  
 TTGGAATTCGTTGATGATGATCATTATCTTTCACTGCGGAGAAGTTTTCG  
 AACGCCGAAACATGCGCA  
 7040 CrRNA insert PDR12 KpnI FW TGCGCATGTTTCGGCGTTCGAAACTTCTCCGCAGTGAAAGATAAATGATCG  
 CTTTTTCGGTACCTAACCTCGTTTTAGAGCTAGAAATAGCAAGTTAAAATAA  
 GGCTAGTCCGTTATCAAC  
 7041 CrRNA insert PDR12 KpnI RV GTTGATAACGGACTAGCCTTATTTTAACTTGCTATTTCTAGCTCTAAAACC  
 AGTTAGGTACCGAAAATGCGATCATTATCTTTCACTGCGGAGAAGTTTTCG  
 AACGCCGAAACATGCGCA  
 7348 ACS2\_targetRNA FW TGCGCATGTTTCGGCGTTCGAAACTTCTCCGCAGTGAAAGATAAATGATCT  
 CCTTGCCGTTAAATCACCAGTTTTAGAGCTAGAAATAGCAAGTTAAAATAA  
 GGCTAGTCCGTTATCAAC  
 6414 ACS1 gRNA GTGCGCATGTTTCGGCGTTCGAAACTTCTCCGCAGTGAAAGATAAATGATC  
 TTCTTACAGCTGGAGACATGTTTTAGAGCTAGAAATAGCAAGTTAAAATA  
 AG  
 7026 GET4\_targetRNA FW BamHI, DpnI TGCGCATGTTTCGGCGTTCGAAACTTCTCCGCAGTGAAAGATAAATGATCG  
 GGCTCGCTAGGATCCAATTTGTTTTAGAGCTAGAAATAGCAAGTTAAAATAA  
 GGCTAGTCCGTTATCAAC  
 7032 NAT1\_targetRNA FW BamHI, DpnI TGCGCATGTTTCGGCGTTCGAAACTTCTCCGCAGTGAAAGATAAATGATCA  
 AAGGAATGGATCCTGCGTGTTTTTAGAGCTAGAAATAGCAAGTTAAAATAA  
 GGCTAGTCCGTTATCAAC

**Repair oligos**

6849 MCH1 Repair Oligo FW GGTGTCATTTATATAAGCTATGAATTTTTAAAAAATAAATGTAGCAGTTT  
 CTTTTTGTGATTTGCACTTGAAAAATGGTTATTGCTATAAAAATGATATGA  
 AAGGAAACTAGTCTCGAT  
 6850 MCH1 Repair Oligo RV ATCGAGACTAGTTTCTTTTATATCATTATATAGCAATAACCATTTTCCAA  
 GTGCAAAATCACAAAAAGAACTGCTACATTTATTTTTTTTAAATTCATA  
 GCTTATATAAATGACACC  
 6851 MCH2 Repair Oligo FW TATAGAACTATATAACTGATACTAGAATATACTAATTCGTGCACTATTAAC  
 CGTTTGGCGAGGTCACTTTTATTTTACACTGTAGATAAGAAGGGGATAGAG  
 TTGCCAGAAAATTTTTTG  
 6852 MCH2 Repair Oligo RV CAAAAAATTTTCTGGCAACTCTATCCCCTTCTTATCTACAGTGTGAAATAA  
 AAGTGACCTCGCCAAACGGTTAATAGTGCACGAATTAGTATATTCTAGTAT

|      |                       |                                                                                                                                                         |
|------|-----------------------|---------------------------------------------------------------------------------------------------------------------------------------------------------|
| 6853 | MCH5 Repair Oligo FW  | CAGTTATATAGTTCTATA<br>TAAAAGAAAAATATTATTGCATTACTTTTTTGAAGATCTATAAAGGGCACTG<br>TCTTACTTTTATTTTTCTTTTTAATCTATAGTAAAATCAGAGCTTTTTTAAT<br>CGATAGTATGCCCCGTG |
| 6854 | MCH5 Repair Oligo RV  | CACGGGGGCATACTATCGATTAAAAAGCTCTGATTTTACTATAGATTA<br>AGAAAAATAAAAGTAAGACAGTGCCTTTATAGATCTTCAAAAAAGTAATG<br>CAATAATATTTTCTTTTA                            |
| 6855 | AQY1 Repair Oligo FW  | CTTTGTATTTGGTGTCTGTCTGCAATACGGCACATAAAGTAACATGTAATT<br>AACTATAACTTTTTCCCTCCTTTTTCTTTATTTCTCGCTCACTAGCACTTAA<br>TGTTATAATACTCGGCAA                       |
| 6856 | AQY1 Repair Oligo RV  | TTGCCGAGTATTATAACATTAAGTGTAGTGAGCGAGAAATAAAGAAAAGG<br>AGGGAAAAAGTTATAGTTAATTACATGTTACTTTTATGTGCCGTATTGACAG<br>ACAGCACCAAATACAAAG                        |
| 6857 | ITR1 Repair Oligo FW  | ATTTTCTACTATGTATTTGAATATTCAATGCGTCTCCTTCCCTTTTACCTC<br>GTGAAAGGATTTAACACCCACTGCAGAAACAAAGAAAATGAAAGAGATGTA<br>TACAGTAGGACGACCAAT                        |
| 6858 | ITR1 Repair Oligo RV  | ATTGGTCGTCTACTGTATACATCTCTTTTCATTTTCTTTGTTTCTGCAGTG<br>GGTGTAAATCCTTTTACGAGGTAAGGAGGAGACGCAATTGAATATTC<br>AAATACATAGTAGAAAAAT                           |
| 7042 | PDR12 Repair Oligo FW | AAAATTGAAAATAAAAAATTGTGTGTTAAACCACGAAATACAAATATATTTG<br>CTTGCTTGTTTTTTTTATTAATAAGAACAATAACAATAAATCTGTAAACCTT<br>TTTTTTAAGTGAAAATTA                      |
| 7043 | PDR12 Repair Oligo RV | TAATTTTCACTTAAAAAAAAGGTTTACAGATTTATTGTTATTGTTCTTATT<br>AATAAAAAACAAGCAAGCAAAATATATTTGTATTTCTGTGTTTAAACACACA<br>ATTTTTATTTTCAATTTT                       |
| 6422 | ACS1 repair fw        | CTATCTATAAGCAAAACCAACATATCAAACTACTAGAAAAGACATTGCC<br>CACTGTGTTTGTATGATTTCTTTCTTTTATATTGACGACTTTTTTTTTCTG<br>TGTGTTTTTGTCTCTTAA                          |
| 6423 | ACS1 repair rv        | TAAGAGAACAAAAACACACGAAAAAAAAGTTCGTCATATAAAAAAGGAAAG<br>AAATCATCAAAACACAGTGGGGCAATGCTTTCTAGTAGTTTTGATATGTTT<br>GGTTTTGCTTATAGATAG                        |
| 7028 | GET4_repair oligo fw  | GGAAGTTAAAAGTTGATGACATCTCAGTTGCTAGATTGGTTAGATTAATAGC<br>CGAATTCGATCCTAGCGAGCCCAATTTAAAGGACGTTATTACTGGTATGAA<br>CAATTGGTCTATCAAAAT                       |
| 7029 | GET4_repair oligo rv  | AATTTGATAGACCAATTTTTCATACCAGTAATAACGTCCTTTAAATTGGGC<br>TCGCTAGGATCGAATTCGGCTATTAATCTAACCAATCTAGCAACTGAGATG<br>TCATCAACTTTAACTTCC                        |
| 7034 | NAT1_repair oligo fw  | GTTTCACCACTATTGGAGAAAATTGTCTTGATTATTTGTCGGATTAGAT<br>CCTACGCGAGGATCGAATTCCTTTTATTTGGACCAATTATTACTTGTCTCAA<br>CATTTCCTTTTCTTAAAG                         |
| 7035 | NAT1_repair oligo rv  | CTTAAGGAAAAGGAAATGTTGAGACAAGTAATAATTGGTCCAAATAAAAGG<br>AATTCGATCCTGCGTAGGATCTAATCCGGACAAATAATCAAGGACAATTTT<br>CTCCAATAGTGGTGAAC                         |

**Diagnostic primers for confirming correct double gRNA plasmid assembly**

|          |                      |                       |
|----------|----------------------|-----------------------|
| Primer A | CACCTTTCGAGAGGACGATG |                       |
| Primer B | GCTGGCCTTTTGCTCACATG |                       |
| 7351     | GET4 dg fw-2         | AATTGGATCCTAGCGAGCCC  |
| 7352     | NAT1 dg fw-2         | ACGCAGGATCCAATTCCTTTG |

**Diagnostic primers for seamless deletion confirmation**

|      |                                     |                          |
|------|-------------------------------------|--------------------------|
| 6862 | MCH1 check FW                       | GTCCAGGATTCTCCGAAGAACTC  |
| 6863 | MCH1 check RV                       | ACGGCTGTTTGTCCGATATTGC   |
| 6864 | MCH2 check FW                       | GCACGACTTTGCAGGCTTTC     |
| 6865 | MCH2 check RV                       | CACCGAACCAACATTAGGTAGC   |
| 6866 | MCH5 check FW                       | GAAGACTGACGGGCCTTTG      |
| 6867 | MCH5 check RV                       | GCCCTAGGCGGTATTGTATGAG   |
| 6868 | AQY1 check FW                       | GATGTCTTCCACCCTCTTACAC   |
| 5593 | 42 - CBS1483_Sc16_Scf39<br>_HPA2-Rv | CGTGTATTGGTGTACGGATGAGTC |
| 6869 | ITR1 check FW                       | AGGTCTTCAATGCCGGGTTAG    |
| 6870 | ITR1 check RV                       | GTATCAGCCGTCAGTAGTATCCAG |
| 253  | PDR12 - CTRL FW                     | CGGTATCACATTTTCTCGACGG   |
| 3998 | PDR12 KO rv                         | CGCGACAGACATTTGTTGG      |

**Diagnostic primers for GET4 and NAT1 mutation confirmation**

|      |            |                         |
|------|------------|-------------------------|
| 7030 | GET4_dg fw | TGTTTCGTTTTGTCTGCTCTTCG |
| 7031 | GET4_dg rv | AACTCAGCCACCGTGCTATC    |
| 7036 | NAT1_dg fw | TATCCAAGATGCGAACCAACC   |
| 7037 | NAT1_dg rv | AGATAGGCTCTTGGCGTACC    |

**Diagnostic primers for confirming strain IMX719**

|      |                     |                          |
|------|---------------------|--------------------------|
| 2619 | acs2 KO Ctrl Rv     | CCGATATTCGGTAGCCGATTCC   |
| 2430 | Tag C-reverse short | GCGTCCAAGTAACTACATTATGTG |
| 2668 | m-PCR-HR2-FW        | ACGCGTGTACGCATGTAAC      |
| 7330 | NATdiagfw           | CGAGCAATGCGCTGCAAAATC    |

|      |                                |                            |
|------|--------------------------------|----------------------------|
| 5044 | ADH1 Flank right FW            | CTAGCGGTTATGCGCGTCTCAC     |
| 2913 | G_RV_2 (PDH construct<br>ctrl) | AATAGCCGCCAGGAAATGCC       |
| 2914 | J_FW (PDH construct ctrl)      | GTCGTCATAACGATGAGGTGTTGC   |
| 2915 | J_RV (PDH construct ctrl)      | GGAGCCAACAAGAATAAGCCGC     |
| 2908 | D_FW (PDH construct ctrl)      | GGATTGGGTGTGATGTAAGGATTCGC |
| 2909 | D_RV (PDH construct ctrl)      | CCCGCTCACACTAACGTAGG       |
| 2916 | I_FW (PDH construct ctrl)      | GCAGGTATGCGATAGTTCCTCAC    |
| 2905 | B_RV (PDH construct ctrl)      | TGGCAGTATTGATAATGATAAACTCG |
| 5641 | F_FW_EF                        | CCATTGCTGAAGCTGACAAG       |
| 2618 | acs2 Ctrl Fw                   | TACCCTATCCCGGCGAAGAAC      |
| 2927 | ACS1 KO ctrl FW                | AAACTGGGCGGCTATTCTAAGC     |
| 2928 | ACS1 KO ctrl RV                | AGCAGCTCGGTTATAAGAGAAC     |

---

# Supplementary data S1

---

Alignment of 120 bp surrounding the target site at the mutated *GET4* locus of the four sequenced colonies (in bold the target site, in lowercase the intended mutation, in yellow additional, undesired mutations).

|                  |     |                                                                      |
|------------------|-----|----------------------------------------------------------------------|
| <b>Reference</b> | 258 | GGAAGTTAAAGTTGATGACATCTCAGTTGCTAGATTGGTTAGATTAATAG <b>CCGAATTGGA</b> |
| Colony #1        |     | GGAAGTTAAAGTTGATGACATCTCAGTTGCTAGATTGGTTAGATTAATAGCCGAATTcGA         |
| Colony #2        |     | GGAAGTTAAAGTTGATGACATCTCAGTTGCTAGATTGGTTAGATTAATAGCCGAATTcGA         |
| Colony #4        |     | GGAAGTTAAAGTTGATGACATCTCAGTTGCTAGATTGGTTAGATTAATAGCCGAATTcGA         |
| Colony #6        |     | GGAAGTTAAAGTTGATGACATCTCAGTTGCTAGATTGGTTAGATTAATAGCCGAATTcGA         |

|                  |     |                                                                         |
|------------------|-----|-------------------------------------------------------------------------|
| <b>Reference</b> | 318 | <b>TCCTAGCGAGCCCAATTTAAAGGACGTTATTACTGGTATGAACAATTGGTCTATCAAATT</b>     |
| Colony #1        |     | TCCTAGCGAGCCCAATTTAAAGGACGTTATTACTGGTATGAACAATTGGTCTATCAAATT            |
| Colony #2        |     | TCCTAGCGAGCCCAATTTAAAG-----TTACTGGTATGAACAATTGGTCTATCAAATT              |
| Colony #4        |     | T-CTAGCGAGCCCAATTTAAAGGACGTTATTAT <b>T</b> TTGGTATGAACAATTGGTCTATCAAATT |
| Colony #6        |     | TCCTAGCGAGCCCAATTTAAAGGACGTTATTACTGGTATGAACAATTGGTCTATCAAATT            |

Alignment of 120 bp surrounding the target site at the mutated *NAT1* locus of the four sequenced colonies (in bold the target site, in lowercase the intended mutation).

|                  |      |                                                                      |
|------------------|------|----------------------------------------------------------------------|
| <b>Reference</b> | 1075 | GTTTCACCACTATTGGAGAAAATTGTCCTTGATTATTTGTCCGGATTAGAT <b>CCTACGCAG</b> |
| Colony #1        |      | GTTTCACCACTATTGGAGAAAATTGTCCTTGATTATTTGTCCGGATTAGATCCTACGCAG         |
| Colony #2        |      | GTTTCACCACTATTGGAGAAAATTGTCCTTGATTATTTGTCCGGATTAGATCCTACGCAG         |
| Colony #4        |      | GTTTCACCACTATTGGAGAAAATTGTCCTTGATTATTTGTCCGGATTAGATCCTACGCAG         |
| Colony #6        |      | GTTTCACCACTATTGGAGAAAATTGTCCTTGATTATTTGTCCGGATTAGATCCTACGCAG         |

|                  |      |                                                                    |
|------------------|------|--------------------------------------------------------------------|
| <b>Reference</b> | 1135 | <b>GATCCAATTCCTTTTATTTGGACCAATTATTACTTGTCTCAACATTTCTTTTCCTTAAG</b> |
| Colony #1        |      | GATCgAATTCCTTTTATTTGGACCAATTATTACTTGTCTCAACATTTCTTTTCCTTAAG        |
| Colony #2        |      | GATCgAATTCCTTTTATTTGGACCAATTATTACTTGTCTCAACATTTCTTTTCCTTAAG        |
| Colony #4        |      | GATCgAATTCCTTTTATTTGGACCAATTATTACTTGTCTCAACATTTCTTTTCCTTAAG        |
| Colony #6        |      | GATCgAATTCCTTTTATTTGGACCAATTATTACTTGTCTCAACATTTCTTTTCCTTAAG        |
